# Supplementary material for: Identification of triptonide as a therapeutic agent for triple negative breast cancer treatment
Source: PubMed Central journal article supplement (PMC7843598; doi:10.1038/s41598-021-82128-0), 2021-01-28

## Supplementary Information

**Title:** Identification of Triptonide as a Therapeutic Agent for Triple Negative Breast Cancer Treatment

**Authors:** Bowen Gao, Jiongyu Chen, Bingchen Han, Xinfeng Zhang, Jijun Hao, Armando E. Giuliano, Yukun Cui, Xiaojiang Cui

## Supplementary Figure Legends

### **Figure S1. Dose-response studies of the triptonide effect on cell proliferation.**

(a) HCC1806 cells were treated 24 hours with triptonide at different concentrations (0.01  $\mu$ M, 0.1  $\mu$ M, 0.2  $\mu$ M, 0.5  $\mu$ M, and 1  $\mu$ M) using the Cell Titer-Glo luminescence assay. Each experiment was repeated twice. Each bar is presented as mean  $\pm$  SD (n = 3). (b) representative images showing the effects of 0.2  $\mu$ M triptonide treatment (24 hours) in ER+ MCF-7 and HER2+ SKBR3 cells. Magnification, x 200. Right, the effect of 0.2  $\mu$ M triptonide on cell growth measured by CellTiter-Glo assays. MCF-7 and SKBR3 cells were treated for 24 (D1), 48 (D2), and 72 hours (D3). Each bar is presented as mean  $\pm$  SD (n = 3). (c) Examination of cell apoptosis in fixed xenograft tumor tissues by TUNEL assays ( $\times$ 400 magnification). Images show induced apoptosis in triptonide-treated tumor tissues.

### **Figure S2. Triptonide attenuates stem-like properties of TNBC cells.**

(a) List of genes with 4-fold or more changes in expression levels detected by RT<sup>2</sup> profiler PCR analysis in HCC1806 cells. (b) Examination of ITGA6, Myc, KLF17, and SNAI1 expression by qRT-PCR in MDA-MB-231 TNBC cells. Each bar is presented as mean  $\pm$  SD (n = 3) (\*, p < 0.05. \*\*, p < 0.01. \*\*\*, p < 0.001).

### **Figure S3. SNAI1 expression is regulated by JNK activation in TNBC cells.**

The effects of ERK inhibition by 10  $\mu$ M U0126 and JNK inhibition by 10  $\mu$ M SP600126 on SNAI1 expression in HCC1806 cells were examined by immunoblotting.

Figure S1

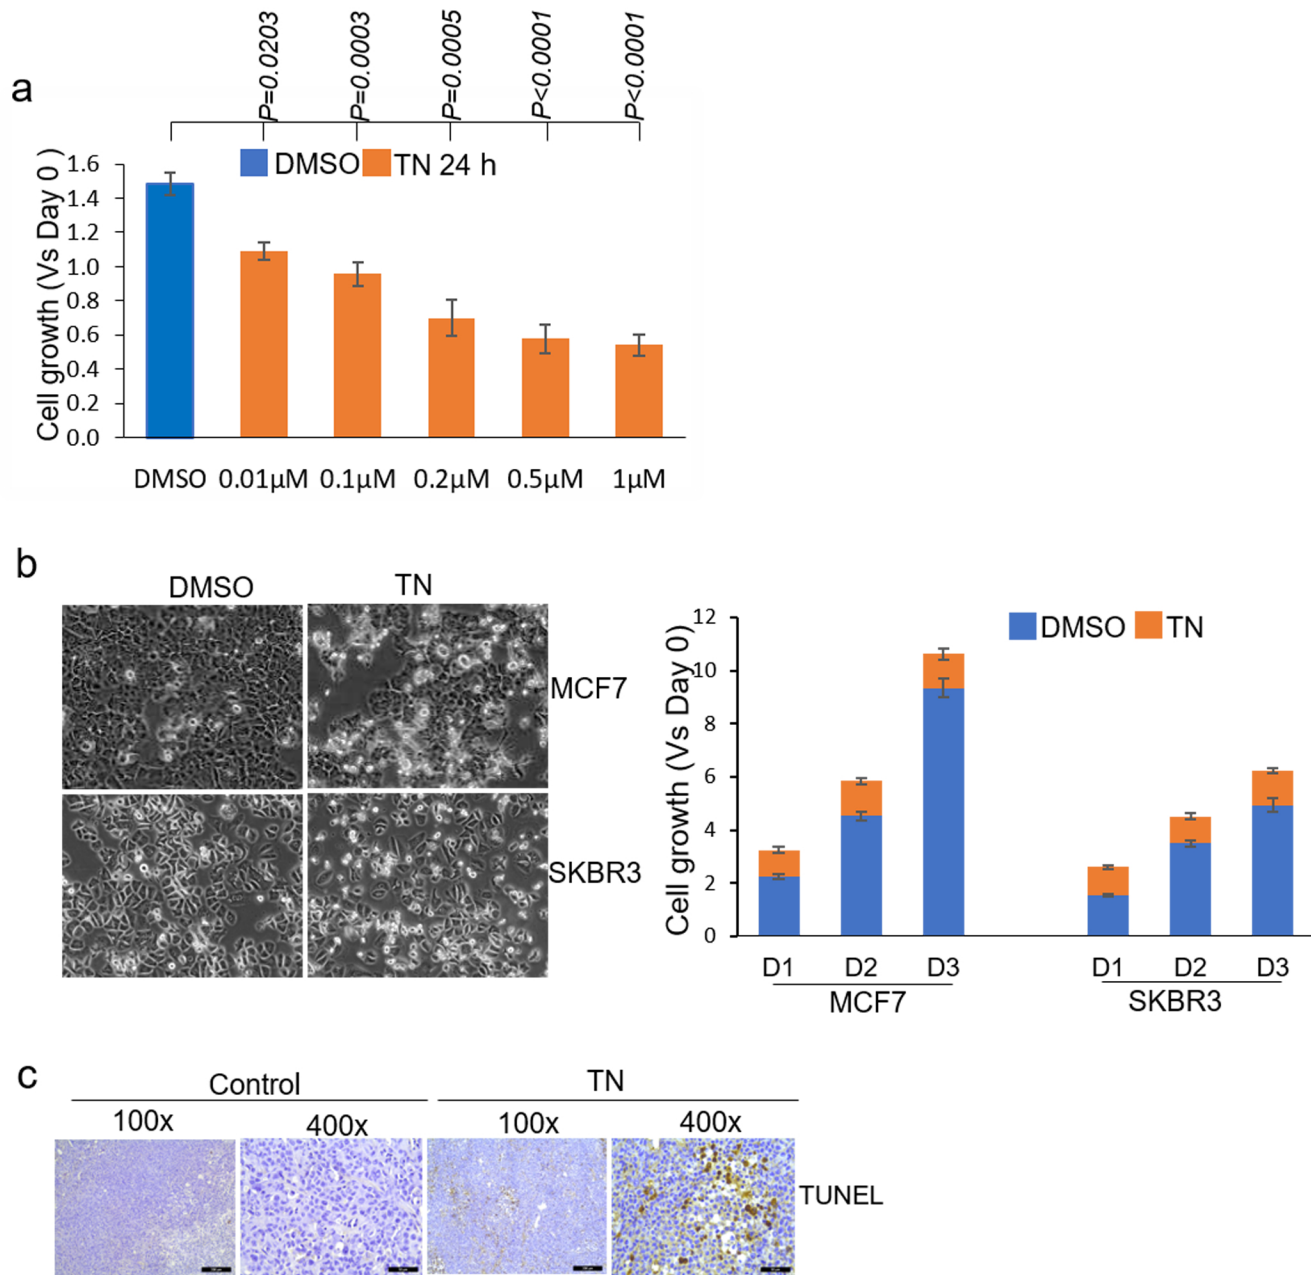

Figure S2

a

| Position | Gene Symbol   | Fold Regulation | p-Value |
|----------|---------------|-----------------|---------|
| G06      | <b>TWIST2</b> | 398.51          | N/A     |
| F11      | <b>SNAI1</b>  | 29.36           | N/A     |
| D09      | <b>KLF17</b>  | 13.05           | N/A     |
| E07      | MYCN          | 9.66            | N/A     |
| E10      | NOS2          | 4.71            | N/A     |
| A11      | CD34          | 4.30            | N/A     |

| Position | Gene Symbol  | Fold Regulation | p-Value |
|----------|--------------|-----------------|---------|
| D03      | <b>ITGA6</b> | -1992.17        | N/A     |
| C10      | ID1          | -22.12          | N/A     |
| B05      | DKK1         | -14.90          | N/A     |
| E06      | <b>MYC</b>   | -14.69          | N/A     |
| D07      | KIT          | -11.96          | N/A     |
| C12      | CXCL8        | -9.23           | N/A     |
| D08      | KITLG        | -7.25           | N/A     |
| A06      | ATXN1        | -5.33           | N/A     |
| D06      | JAK2         | -4.99           | N/A     |
| H06      | HGDC         | -4.84           | N/A     |
| E11      | NOTCH1       | -4.71           | N/A     |
| G12      | ZEB2         | -4.69           | N/A     |
| G07      | WEE1         | -4.25           | N/A     |
| C02      | FGFR2        | -4.25           | N/A     |

b

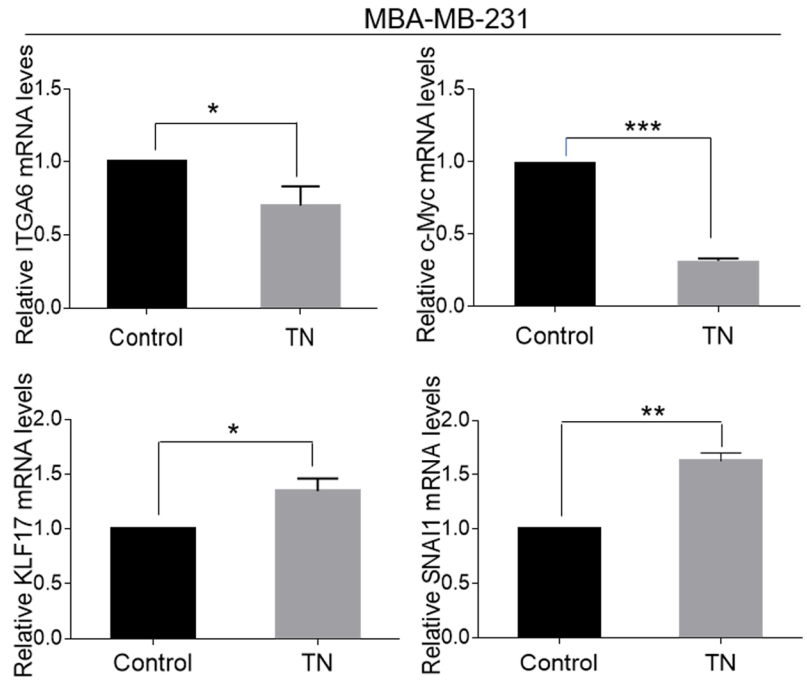



Figure S3

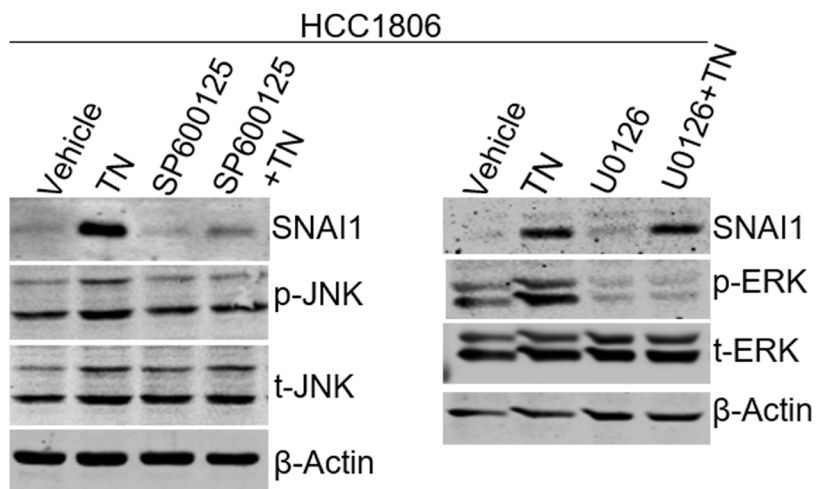

Figure S4, full-length images

Figure 1c

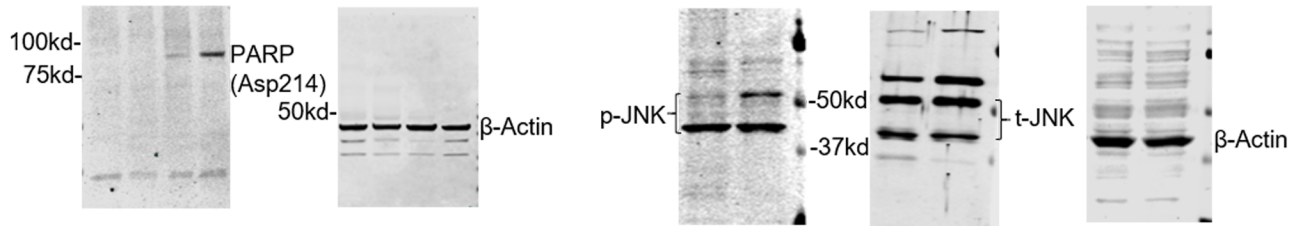

Figure 2e

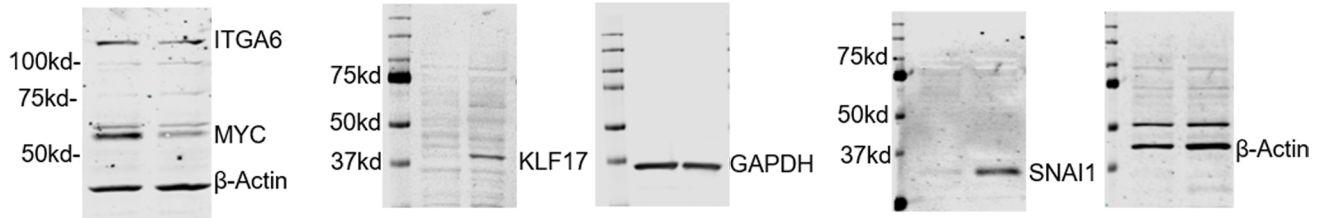

Figure 3c

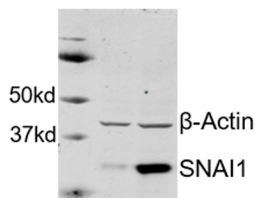

Figure 3d

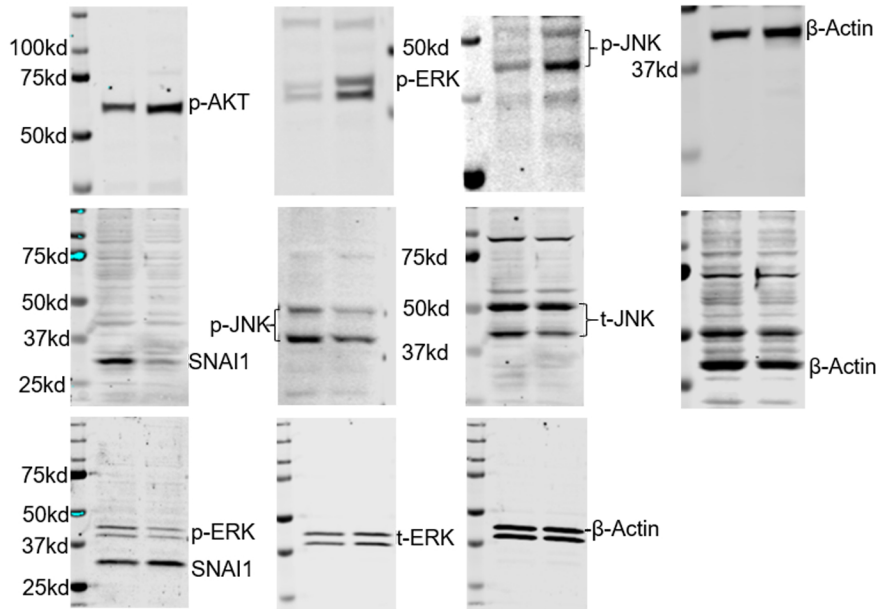

Figure 4a

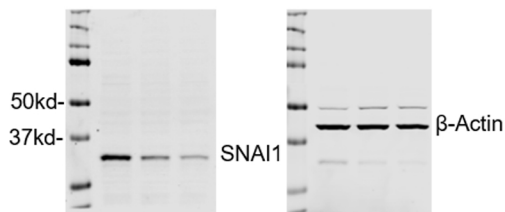

Figure 4b

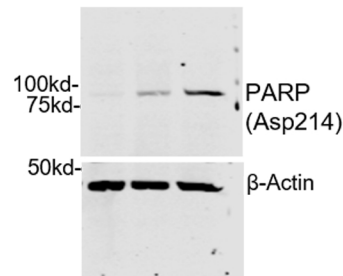

Figure S3

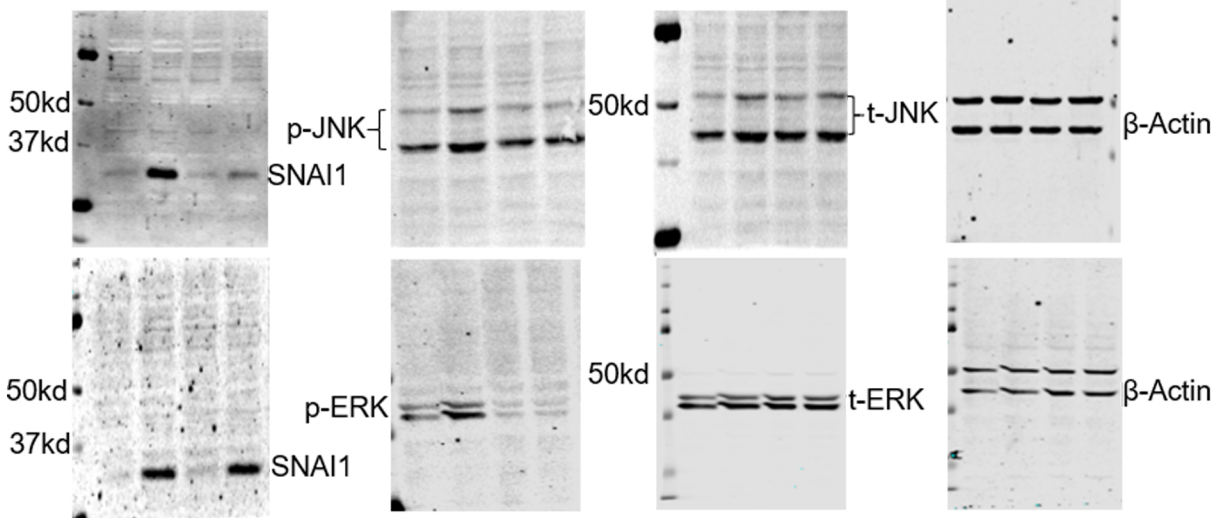

Supplement: 41598_2021_82128_MOESM1_ESM.pdf [file 41598_2021_82128_MOESM1_ESM.pdf]
